# Supplementary material for: Frustrated Lewis pair chemistry in 2D CeO2 for efficient alkaline hydrogen evolution
Source: Royal Society of Chemistry journal article supplement (doi:10.1039/d4ta06191h), 2024-01-01
Supplement: d4ta06191h1.pdf [file d4ta06191h1.pdf]

## **Frustrated lewis pair chemistry in 2D CeO<sub>2</sub> for efficient alkaline hydrogen evolution**

Kaisi Liu,<sup>‡a</sup> Tongtong Liu,<sup>‡a</sup> Xinyi Wu,<sup>‡a</sup> Jiao Dai,<sup>a</sup> Qingjun Chen,<sup>b</sup> Jun Wan,<sup>\*a</sup> Lei Liu<sup>\*a</sup>

<sup>a</sup> Center for Computational Chemistry, Hubei Key Laboratory of Biomass Fibers and Eco-Dyeing & Finishing, School of Chemistry and Chemical Engineering, Wuhan Textile University, Wuhan, Hubei 430200, China

<sup>b</sup> Key Laboratory of Rare Earths, Chinese Academy of Sciences, Ganjiang Innovation Academy, Chinese Academy of Sciences, Ganzhou 341000, China

<sup>‡</sup> These authors contributed equally to the work.

\* Corresponding authors.

E-mail addresses: [wanj@wtu.edu.cn](mailto:wanj@wtu.edu.cn) (J. Wan); [liulei@wtu.edu.cn](mailto:liulei@wtu.edu.cn) (L. Liu)

### **Supplementary materials:**

**1. Fig. S1 to S7**

**2. Table S1 to S3**

# 1. Fig. S1 to S7

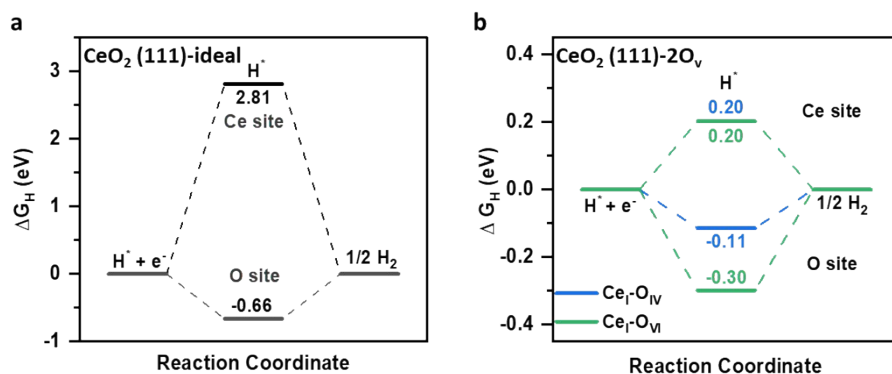

**Fig. S1.**  $\Delta G_H$  of the HER on (a)  $\text{CeO}_2$  (111)-ideal facet and on the  $\text{Ce}_I\text{-O}_{IV}$  and  $\text{Ce}_I\text{-O}_{VI}$  FLPs on the  $\text{CeO}_2$  (111)- $2\text{O}_v$  facet.

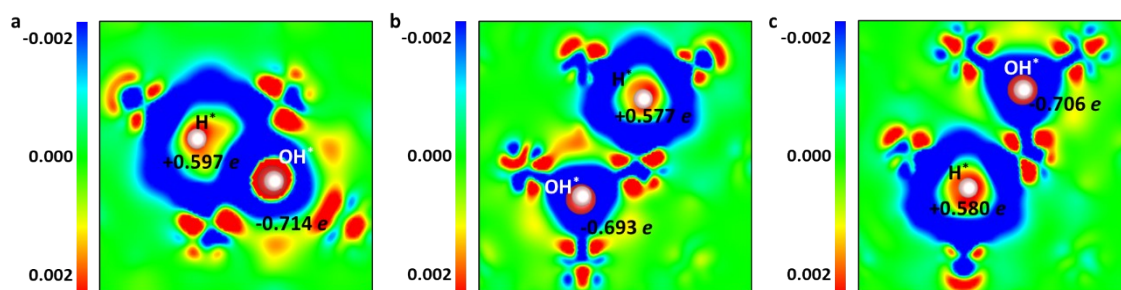

**Fig. S2.** Charge density difference maps of water dissociation on (a)  $\text{Ce}_I\text{-O}_V$  FLP sites of  $\text{CeO}_2$  (111)- $\text{O}_V$  facet and (b)  $\text{Ce}_I\text{-O}_{IV}$  and (c)  $\text{Ce}_I\text{-O}_{VI}$  of  $\text{CeO}_2$  (111)- $2\text{O}_v$  facet.

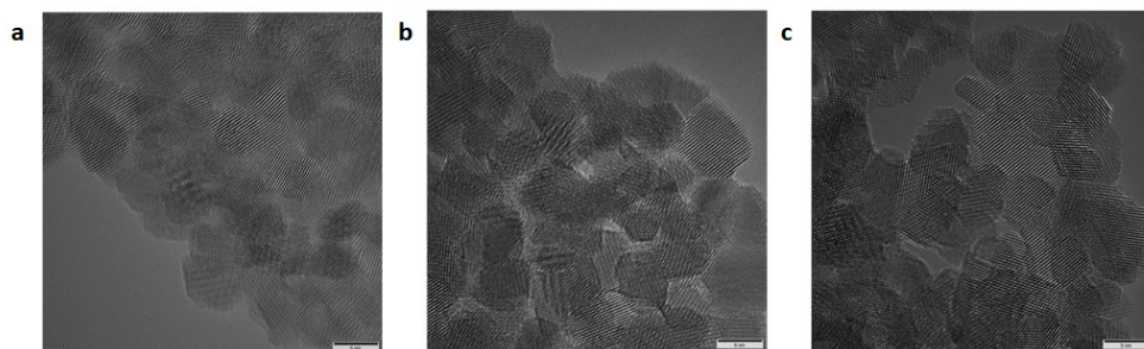

**Fig. S3.** HRTEM images of (a)  $\text{CeO}_2\text{-I}$ , (b)  $\text{CeO}_2\text{-II}$  and (c)  $\text{CeO}_2\text{-III}$ . (d) The SEM images of  $\text{CeO}_2\text{-I}$  after testing electrocatalytic properties.

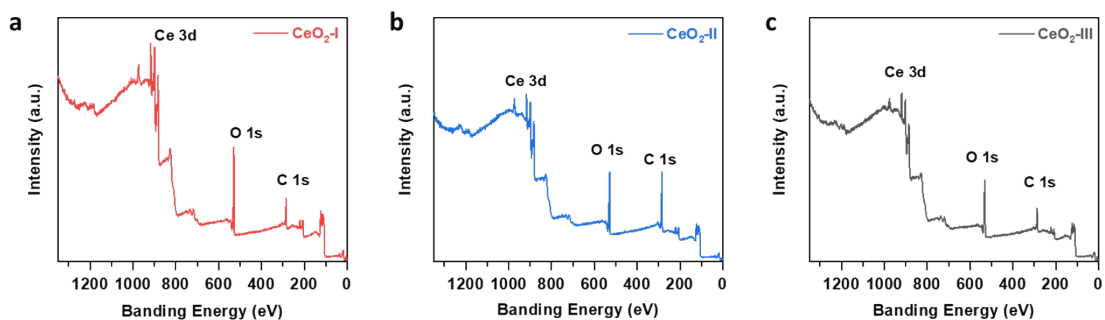

**Fig. S4.** Full spectra of (a) CeO<sub>2</sub>-I, (b) CeO<sub>2</sub>-II and (c) CeO<sub>2</sub>-III.

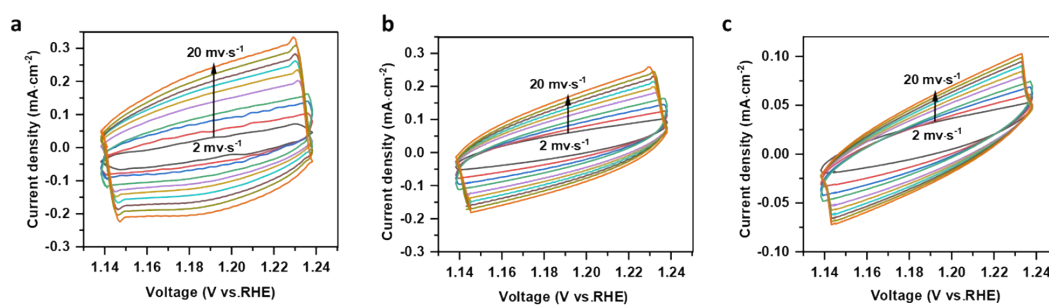

**Fig. S5.** CV measurements in a non-faradic current region (1.14-1.24 V) in 1.0 M KOH solution at scan rates of 2 to 20 mV s<sup>-1</sup> of (a) CeO<sub>2</sub>-I, (b) CeO<sub>2</sub>-II and (c) CeO<sub>2</sub>-III.

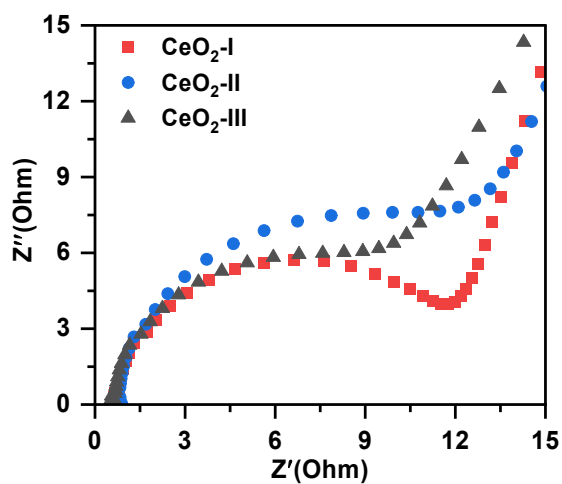

**Fig. S6.** Comparison of Nyquist plots for CeO<sub>2</sub>-I, CeO<sub>2</sub>-II, and CeO<sub>2</sub>-III.

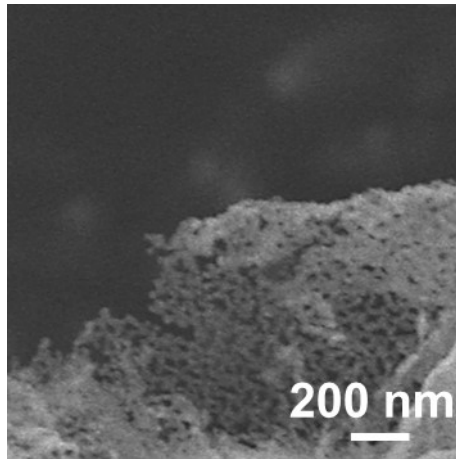

**Fig. S7.** The SEM images of CeO<sub>2</sub>-I after 15 hours of chronopotentiometric measurements.

## 2. Table S1 to S3

Table S1. Bader charge population of the atoms on the surface of CeO<sub>2</sub> (111).

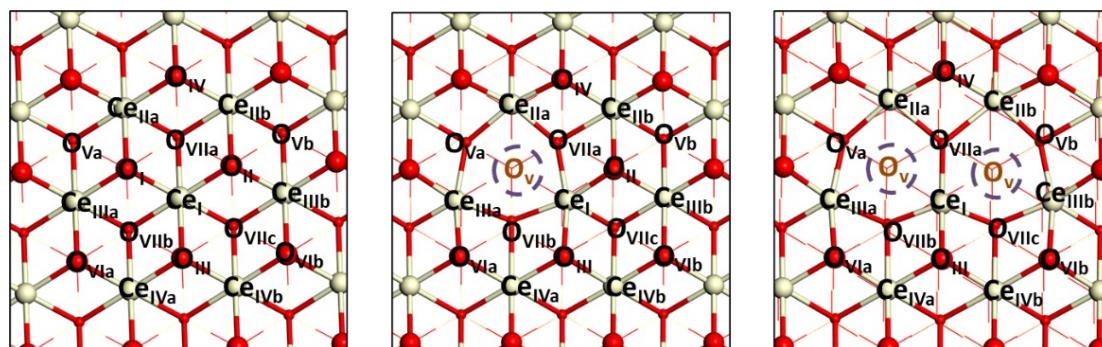

Bader charge population / *e*

| Atom               | Ideal CeO <sub>2</sub> (111) | CeO <sub>2</sub> (111) with one oxygen vacancy | CeO <sub>2</sub> (111) with two oxygen vacancy |
|--------------------|------------------------------|------------------------------------------------|------------------------------------------------|
| Ce <sub>I</sub>    | <b>+2.246</b>                | <b>+2.206</b>                                  | <b>+2.160</b>                                  |
| Ce <sub>IIIb</sub> | +2.246                       | +2.205                                         | +2.199                                         |
| Ce <sub>IIIb</sub> | +2.246                       | +2.259                                         | +2.199                                         |
| Ce <sub>IIIa</sub> | +2.246                       | +2.202                                         | +2.192                                         |
| Ce <sub>IIIb</sub> | +2.246                       | +2.241                                         | +2.192                                         |
| Ce <sub>IVa</sub>  | +2.246                       | +2.256                                         | +2.253                                         |
| Ce <sub>IVb</sub>  | +2.246                       | +2.244                                         | +2.251                                         |
| O <sub>I</sub>     | -1.132                       | /                                              | /                                              |
| O <sub>II</sub>    | -1.132                       | -1.147                                         | /                                              |
| O <sub>III</sub>   | -1.132                       | -1.147                                         | -1.159                                         |
| O <sub>IV</sub>    | <b>-1.132</b>                | <b>-1.147</b>                                  | -1.148                                         |
| O <sub>Va</sub>    | -1.137                       | -1.178                                         | <b>-1.185</b>                                  |
| O <sub>Vb</sub>    | -1.137                       | -1.183                                         | -1.186                                         |
| O <sub>VIa</sub>   | -1.132                       | -1.151                                         | -1.155                                         |
| O <sub>VIb</sub>   | -1.132                       | -1.142                                         | -1.155                                         |
| O <sub>VIIa</sub>  | -1.137                       | -1.183                                         | -1.251                                         |
| O <sub>VIIb</sub>  | -1.137                       | -1.178                                         | -1.175                                         |
| O <sub>VIIc</sub>  | -1.137                       | -1.123                                         | -1.172                                         |

**Table S2.** Top views of structures related to water dissociation on the CLP of CeO<sub>2</sub>(111)-ideal, and the FLPs of CeO<sub>2</sub>(111)-O<sub>v</sub> and CeO<sub>2</sub>(111)-2O<sub>v</sub>.

| Surface                                | Ce <sub>I</sub> -O <sub>IV</sub>                                                   | Ce <sub>I</sub> -O <sub>V</sub>                                                     | Ce <sub>I</sub> -O <sub>VI</sub>                                                     |
|----------------------------------------|------------------------------------------------------------------------------------|-------------------------------------------------------------------------------------|--------------------------------------------------------------------------------------|
| CeO <sub>2</sub> (111)-ideal           | 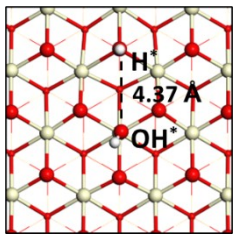  |                                                                                     |                                                                                      |
| CeO <sub>2</sub> (111)-O <sub>v</sub>  |   |   |                                                                                      |
| CeO <sub>2</sub> (111)-2O <sub>v</sub> |  |  |  |

**Table S3.** Bader charge population of surface atoms after water dissociation by CeO<sub>2</sub>(111).

| Atom               | Bader charge population / <i>e</i> |                                                |                                                |
|--------------------|------------------------------------|------------------------------------------------|------------------------------------------------|
|                    | Ideal CeO <sub>2</sub> (111)       | CeO <sub>2</sub> (111) with one oxygen vacancy | CeO <sub>2</sub> (111) with two oxygen vacancy |
| Ce <sub>I</sub>    | <b>+2.351</b>                      | <b>+2.262</b>                                  | <b>+2.251</b>                                  |
| Ce <sub>IIIb</sub> | +2.244                             | +2.243                                         | +2.269                                         |
| Ce <sub>IIb</sub>  | +2.245                             | +2.228                                         | +2.274                                         |
| Ce <sub>IIIa</sub> | +2.245                             | +2.234                                         | +2.225                                         |
| Ce <sub>IIIb</sub> | +2.242                             | +2.233                                         | +2.203                                         |
| Ce <sub>IVa</sub>  | +2.238                             | +2.285                                         | +2.274                                         |
| Ce <sub>IVb</sub>  | +2.239                             | +2.233                                         | +2.269                                         |
| O <sub>I</sub>     | -1.085                             | /                                              | /                                              |
| O <sub>II</sub>    | -1.094                             | -1.149                                         | /                                              |
| O <sub>III</sub>   | -1.109                             | -1.145                                         | -1.153                                         |
| O <sub>IV</sub>    | <b>-1.268</b>                      | <b>-1.270</b>                                  | -1.158                                         |
| O <sub>Va</sub>    | -1.109                             | -1.169                                         | <b>-1.305</b>                                  |
| O <sub>Vb</sub>    | -1.116                             | -1.145                                         | -1.133                                         |
| O <sub>VIa</sub>   | -1.135                             | -1.144                                         | -1.153                                         |
| O <sub>VIb</sub>   | -1.139                             | -1.140                                         | -1.150                                         |
| O <sub>VIIa</sub>  | -1.139                             | -1.145                                         | -1.181                                         |
| O <sub>VIIb</sub>  | -1.115                             | -1.127                                         | -1.144                                         |
| O <sub>VIIc</sub>  | -1.116                             | -1.146                                         | -1.168                                         |
